# Supplementary material for: Dual vaccination against IL-4 and IL-13 protects against chronic allergic asthma in mice
Source: PubMed Central journal article supplement (PMC8113315; doi:10.1038/s41467-021-22834-5), 2021-05-11
Supplement: 41467_2021_22834_MOESM1_ESM.pdf [file 41467_2021_22834_MOESM1_ESM.pdf]

## **Dual vaccination against IL-4 and IL-13 protects against chronic allergic asthma in mice**

Eva Conde<sup>1,2,3,†</sup>, Romain Bertrand<sup>3,†</sup>, Bianca Balbino<sup>1,2</sup>, Jonathan Bonnefoy<sup>3</sup>, Julien Stackowicz<sup>1,2</sup>, Noémie Caillot<sup>3</sup>, Fabien Colaone<sup>3</sup>, Samir Hamdi<sup>3</sup>, Raïssa Houmadi<sup>4</sup>, Alexia Lose<sup>4</sup>, Jasper B.J. Kamphuis<sup>4</sup>, François Huetz<sup>1</sup>, Laurent Guilleminault<sup>4,5</sup>, Nicolas Gaudenzio<sup>4</sup>, Aurélie Mougel<sup>4</sup>, David Hardy<sup>6</sup>, John N. Snouwaert<sup>7</sup>, Beverly H. Koller<sup>7</sup>, Vincent Serra<sup>3</sup>, Pierre Bruhns<sup>1,§</sup>, Géraldine Grouard-Vogel<sup>3,§</sup>, Laurent L. Reber<sup>1,4,§,\*</sup>

<sup>1</sup>Unit of Antibodies in Therapy and Pathology, Institut Pasteur, UMR 1222 INSERM, F-75015 Paris, France. <sup>2</sup>Sorbonne University, ED394, F-75005 Paris, France. <sup>3</sup>Neovacs SA, Paris, France. <sup>4</sup>Toulouse Institute for Infectious and Inflammatory Diseases (Infinity), INSERM UMR1291, CNRS UMR5051, University Toulouse III, 31024 Toulouse, France. <sup>5</sup> Department of respiratory medicine, Toulouse University Hospital, Faculty of Medicine, Toulouse, France. <sup>6</sup>Institut Pasteur, Experimental Neuropathology Unit, Paris, 75015, France. <sup>7</sup>Department of Genetics, University of North Carolina at Chapel Hill, Chapel Hill, NC 27599, USA. †These authors contributed equally. §These authors jointly supervised this work. \*Corresponding author.

Email: laurent.reber@inserm.fr

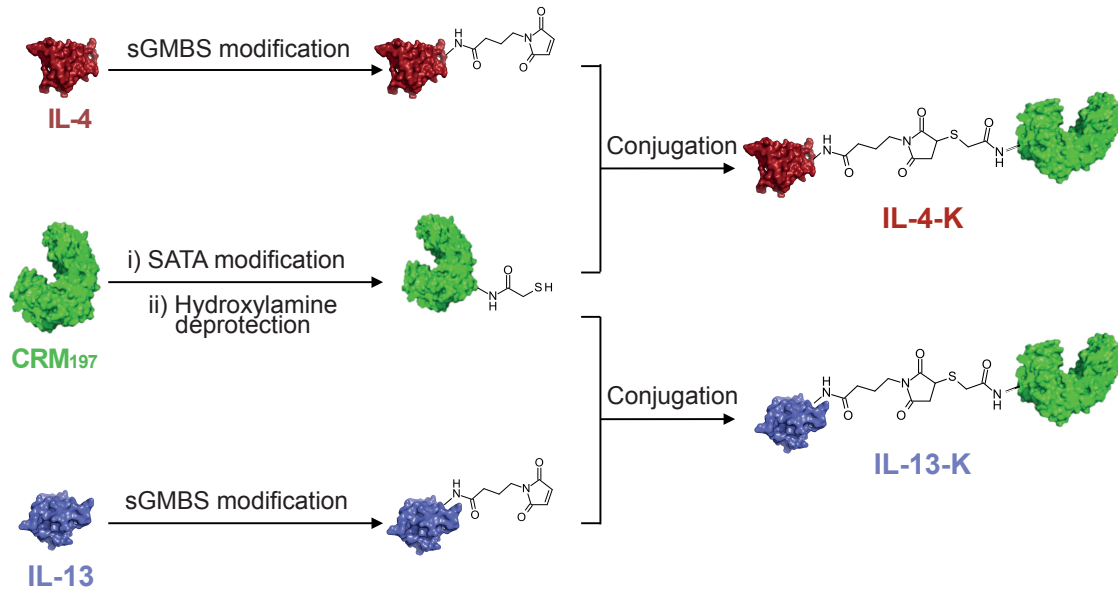

**Supplementary Figure 1. Synthesis of IL-4-K and IL-13-K using a thiol-maleimide conjugation.** Recombinant mouse IL-4 and IL-13 were modified with N- $\gamma$ -maleimidobutyryloxysuccinimide ester (sGMBS), a maleimide-containing agent reacting with primary amines. Sulfhydryl moieties were introduced on the carrier protein, CRM<sub>197</sub>, with SATA (N-succinimidyl-S-acetylthioacetate). Functionalized CRM<sub>197</sub> was added to functionalized IL-4 or IL-13 at a molar ratio of 1:2 (CRM<sub>197</sub>-IL-4) or 1:4 (CRM<sub>197</sub>-IL-13), to generate the IL-4 kinoid (IL-4-K) and IL-13-K, respectively.

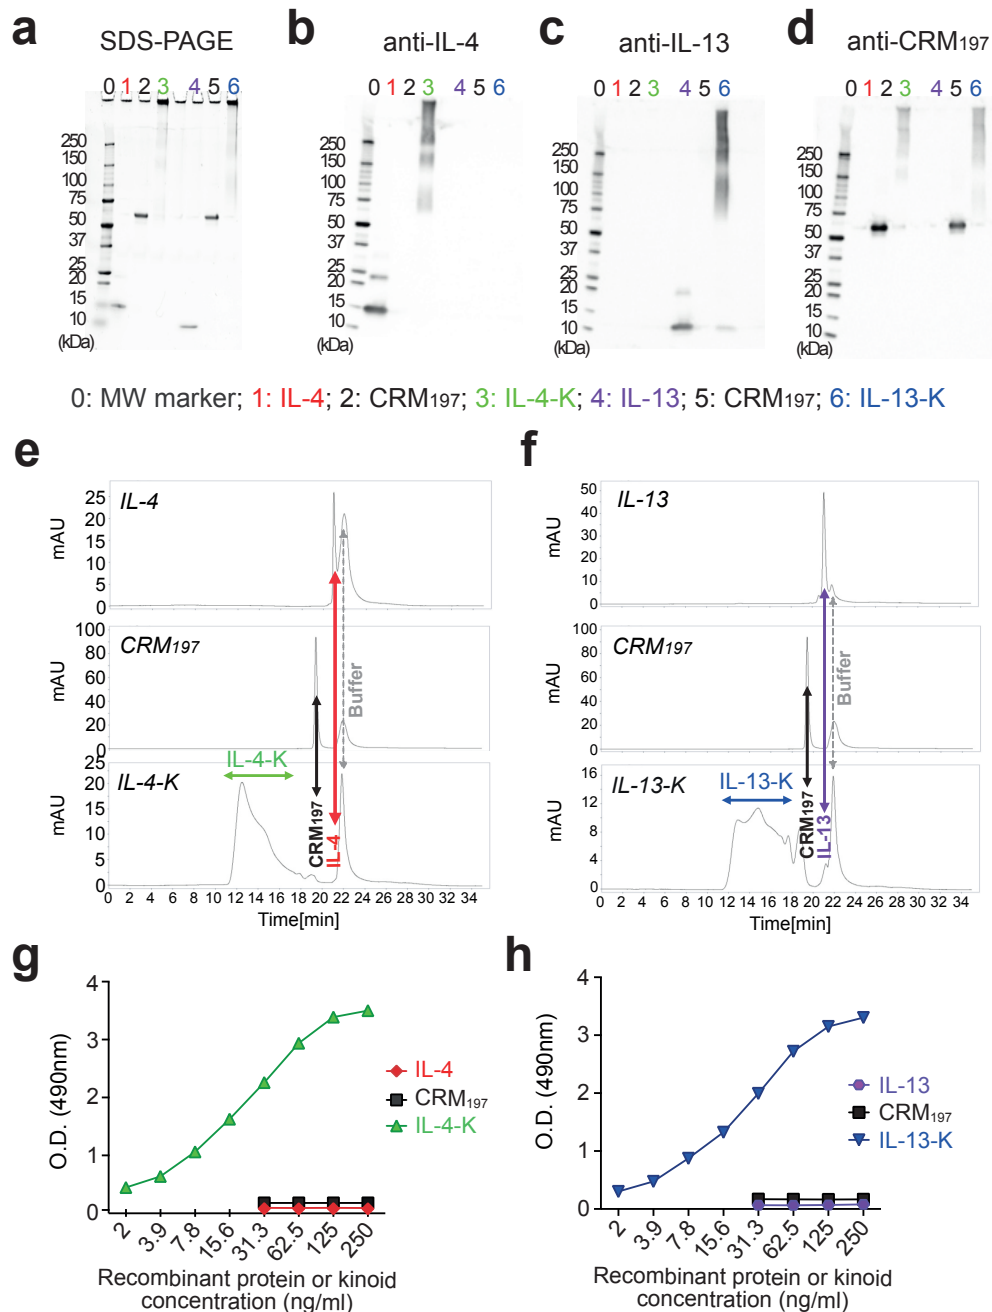

**Supplementary Figure 2. Characterization of mouse IL-4-K and IL-13-K.** Generation of high molecular weight kinoids upon conjugation of IL-4 or IL-13 to CRM<sub>197</sub> was confirmed using SDS-PAGE (**a**), western blots against IL-4 (**b**), IL-13 (**c**) or CRM<sub>197</sub> (**d**), and size exclusion (SE)-HPLC (**e** and **f**). Epitope preservation and antigenicity of IL-4-K and IL-13-K was analyzed by sandwich ELISA using plates coated with anti-CRM<sub>197</sub> antibodies and revealed with anti-IL-4 (**g**) or anti-IL-13 (**h**) antibodies. Data from **a**, **b**, **c** and **d** are representative of five independent experiments. Source data are provided in the Source Data file.

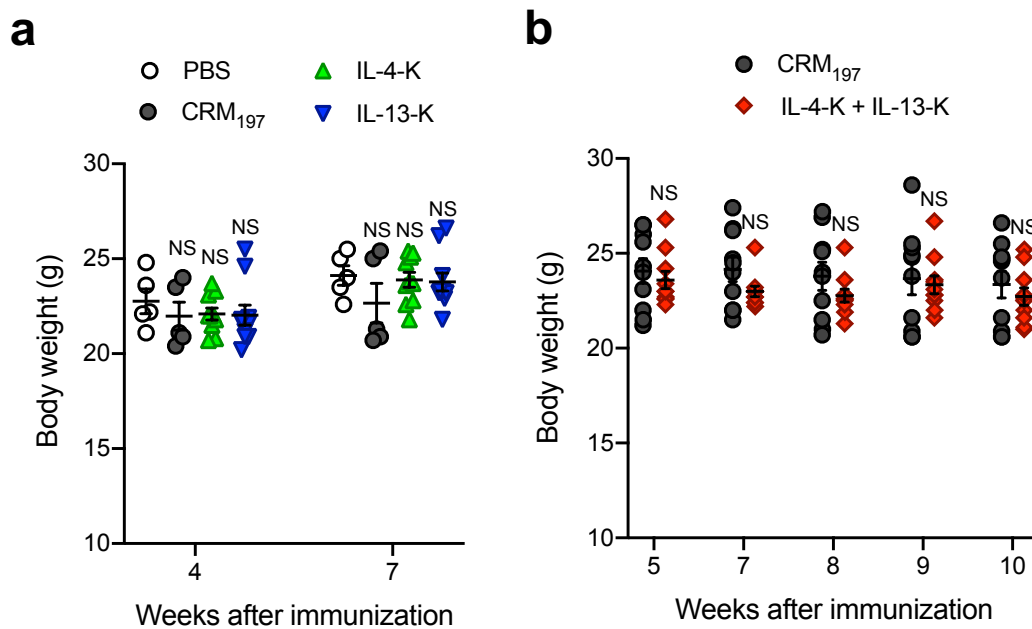

**Supplementary Figure 3. Changes in body weight following vaccination with kinoids.** Mice were immunized with IL-4-K, IL-13-K, CRM<sub>197</sub> or PBS as control (**a**), or IL-4-K and IL-13-K in combination or CRM<sub>197</sub> (**b**), as outlined in Figure 1A. Body weight was measured at the indicated time points after first injection of kinoids. Results show values from individual mice with bars indicating mean values  $\pm$  SEMs ( $n=5$  mice in PBS and CRM<sub>197</sub> control groups from (a) or  $n=10$  mice in IL-4-K, IL-13-K, IL-4-K+IL-13-K and CRM<sub>197</sub> groups), and are pooled from two independent experiments. NS: not significant ( $P>0.05$ ) *vs.* PBS group in (a) and *vs.* CRM<sub>197</sub> group in (b). (Mann-Whitney  $U$  test). Source data are provided in the Source Data file.

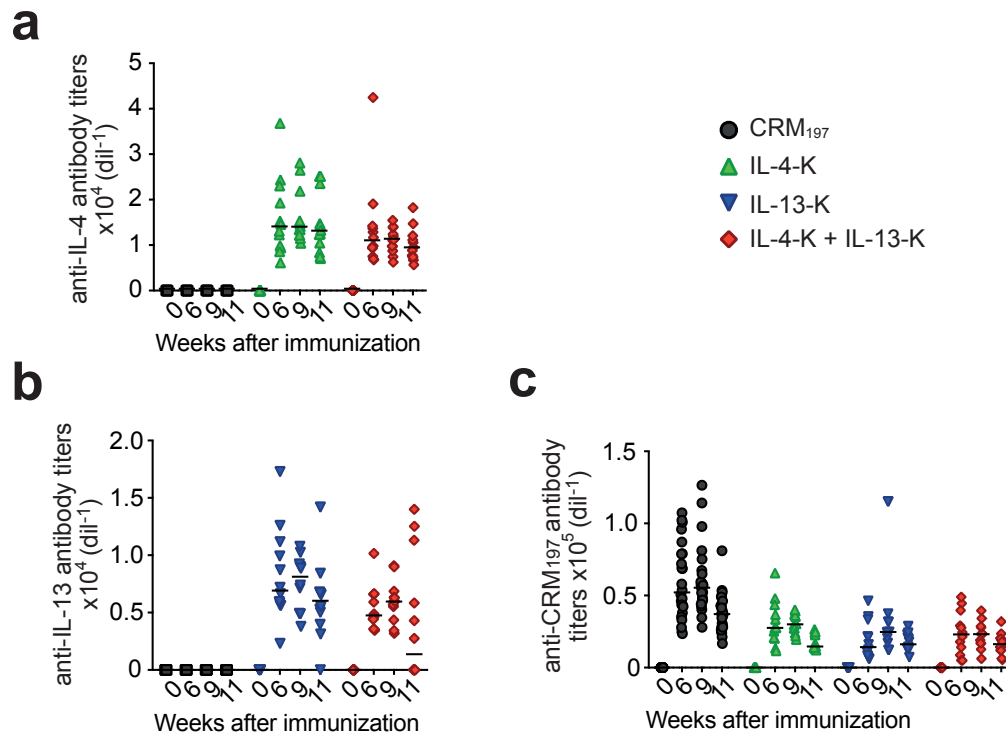

**Supplementary Figure 4. Anti-IL-4, anti-IL-13 and anti-CRM<sub>197</sub> antibody titers in mice vaccinated with kinoids. a-c.** Anti-IL-4 (a), anti-IL-13 (b) and anti-CRM<sub>197</sub> (c) antibody titers in sera at 6, 9 and 11 weeks after first injection of IL-4-K and IL-13-K alone or in combination, or CRM<sub>197</sub> as a control. Results show values from individual mice with bars indicating medians. Data are from a single experiment with  $n=12$  mice per group, representative of two independent experiments. Source data are provided in the Source Data file.

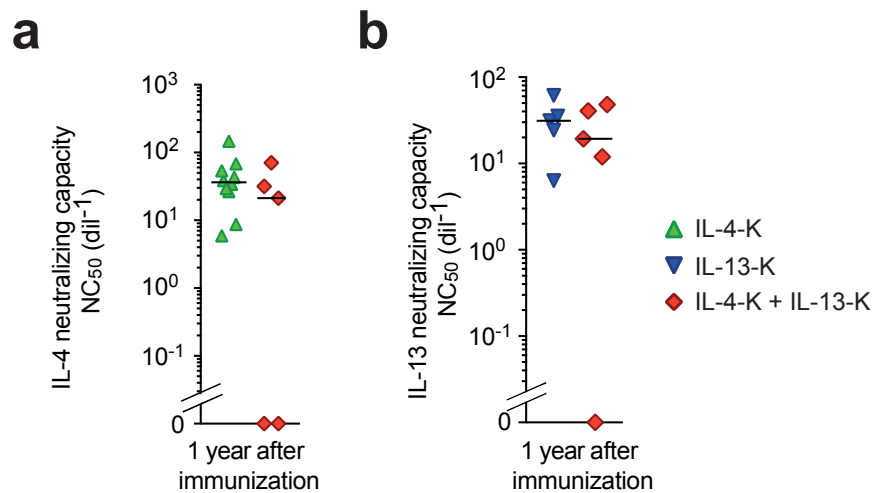

**Supplementary Figure 5. Anti-IL-4 and anti-IL-13 neutralizing capacity one year after vaccination.** Anti-IL-4 (a) and anti-IL-13 (b) neutralizing capacity in sera collected one year after the first injection of IL-4-K and/or IL-13-K. Results show values from individual mice with bars indicating medians, and are expressed as the serum dilution factor (dil<sup>-1</sup>) neutralizing 50 % of IL-4 or IL-13 activity (0 indicates no neutralizing capacity). Data are from a single experiment ( $n=5$  mice in IL-13-K and IL-4-K+IL-13-K groups and  $n=10$  mice in IL-4-K group). Source data are provided in the Source Data file.

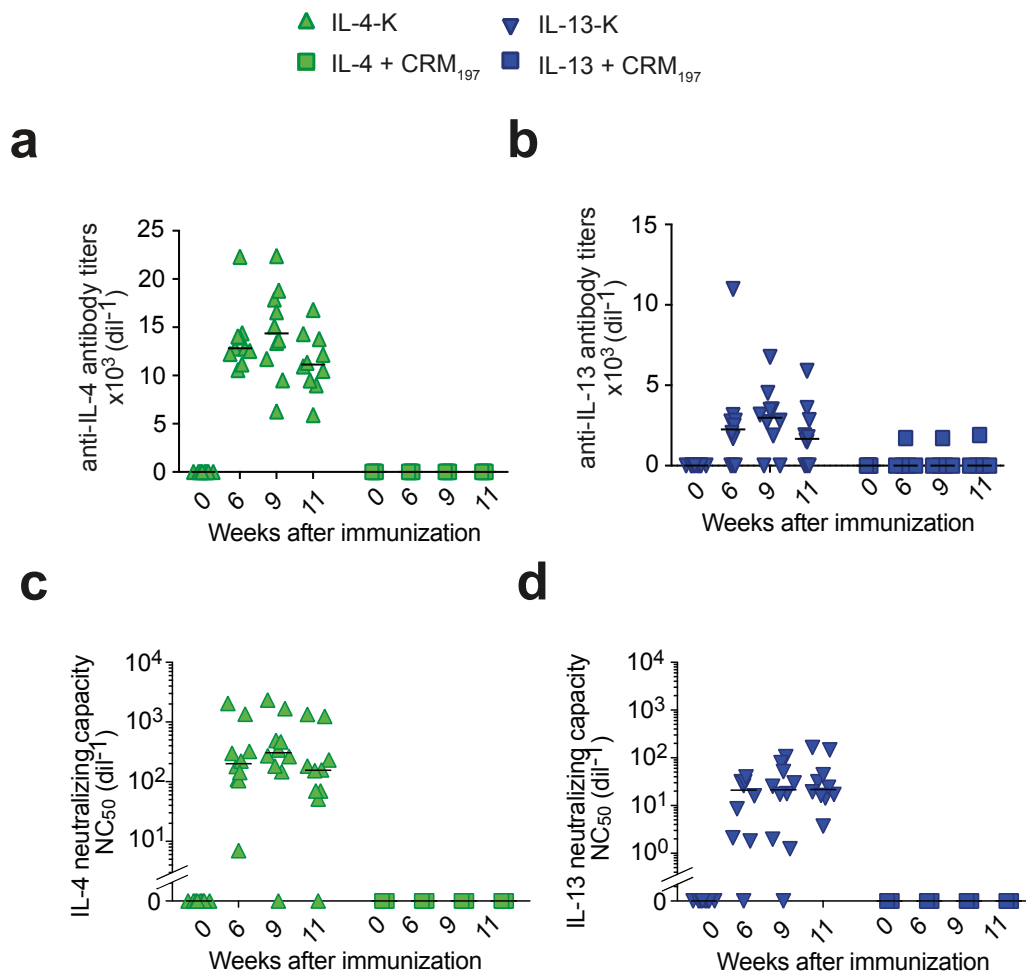

**Supplementary Figure 6. Conjugation between IL-4/IL-13 and CRM<sub>197</sub> is mandatory to mount a potent antibody response.** **a.** Anti-IL-4 antibody titers in sera from mice immunized with IL-4-K or with a mixture of soluble IL-4 and CRM<sub>197</sub> without prior conjugation. **b.** Anti-IL-13 antibody titers in sera from mice immunized with IL-13-K or with a mixture of soluble IL-13 and CRM<sub>197</sub> without prior conjugation. Results in **a** and **b** show values from individual mice with bars indicating medians from  $n=10$  (IL-4-K or IL-13-K) or  $n=5$  (IL-4 + CRM<sub>197</sub> or IL-13 + CRM<sub>197</sub>) mice per group. **c.** Anti-IL-4 neutralizing capacity in sera from mice immunized with IL-4-K or with a mixture of soluble IL-4 and CRM<sub>197</sub> without prior conjugation. **d.** Anti-IL-13 neutralizing capacity in sera from mice immunized with IL-13-K or with a mixture of soluble IL-13 and CRM<sub>197</sub> without prior conjugation. Results in **c** and **d** show values from individual mice with bars indicating medians from  $n=10$  (IL-4-K or IL-13-K) or  $n=5$  (IL-4 + CRM<sub>197</sub> or IL-13 + CRM<sub>197</sub>) mice per group, and are expressed as the serum dilution factor (dil<sup>-1</sup>) neutralizing 50 % of IL-4 or IL-13 activity (0 indicates no neutralizing capacity). Source data are provided in the Source Data file.

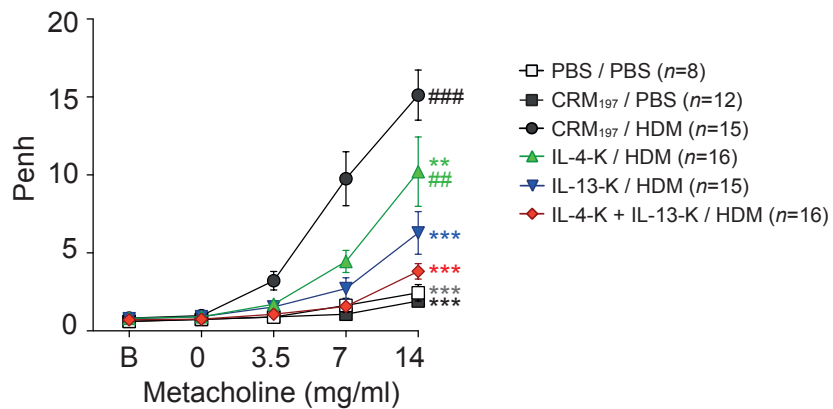

**Supplementary Figure 7. Effects of IL-4-K and/or IL-13-K on HDM-induced airway hyperresponsiveness measured using non-invasive plethysmography.** Mice were vaccinated with IL-4-K and/or IL-13-K (or PBS or CRM<sub>197</sub> as controls) followed by sensitization and challenges with HDM (or PBS as a control), as outlined in Figure 1A. Penh responses to increasing doses of methacholine was measured using non-invasive plethysmography 24 hours after the last challenge. Data represent mean values  $\pm$  SEMs and are pooled from two independent experiments. Adjusted *P*-values calculated using a 2-way ANOVA test followed by a Tukey posttest: ###:  $P < 0.0001$  and #:  $P = 0.0019$  vs. CRM<sub>197</sub>/PBS group; \*\*:  $P = 0.0027$ , \*\*\*:  $P < 0.0001$  vs. CRM<sub>197</sub>/HDM group. Source data are provided in the Source Data file.



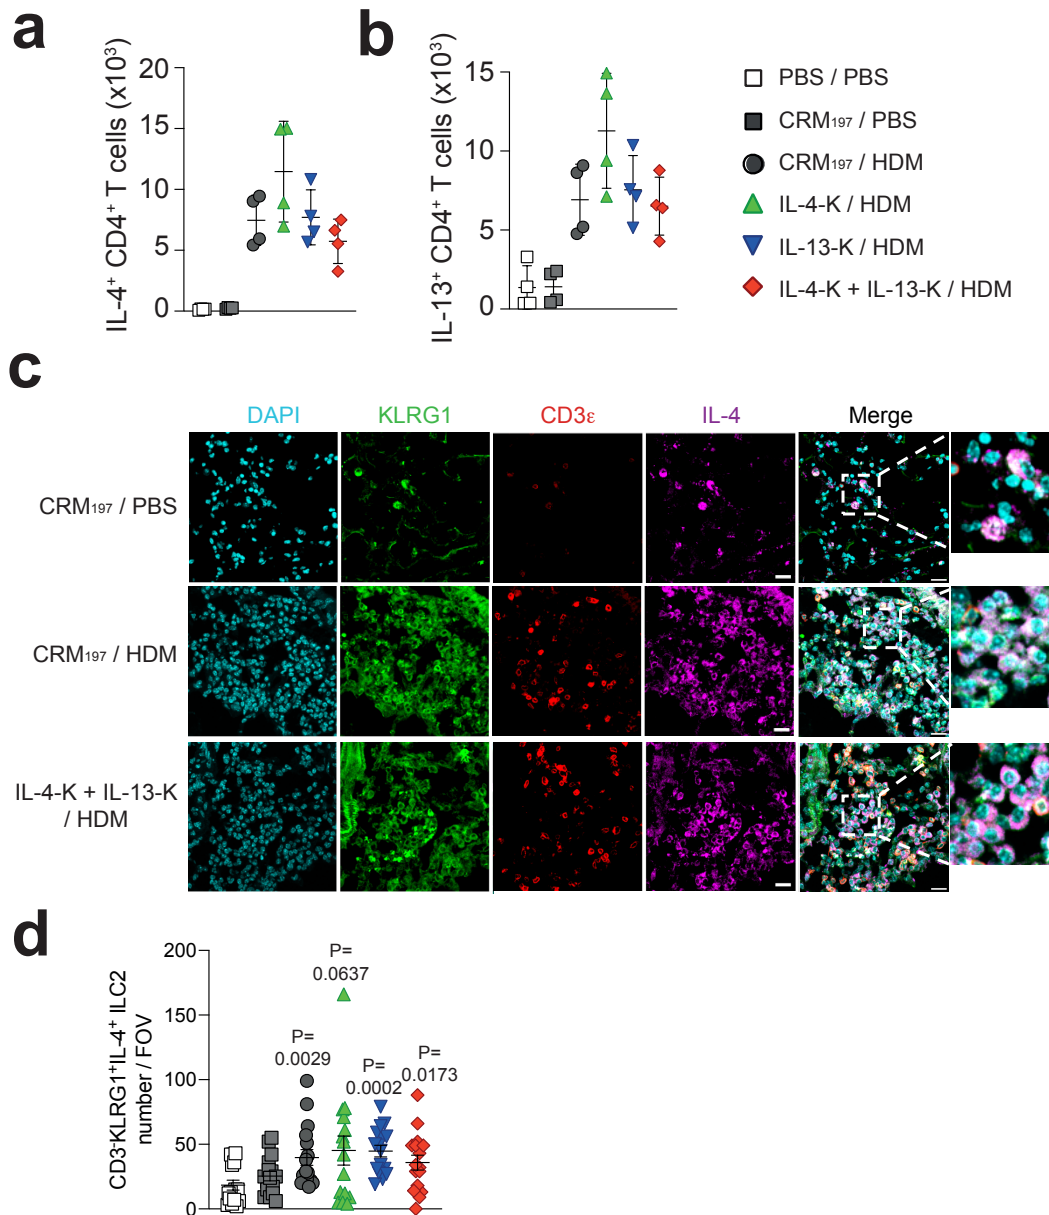

**Supplementary Figure 8. Effects of IL-4-K and/or IL-13-K on IL-4<sup>+</sup> and IL-13<sup>+</sup> CD4 T cells and on IL-4<sup>+</sup> ILC2.** Mice were vaccinated with IL-4-K and/or IL-13-K (or PBS or CRM<sub>197</sub> as controls) followed by sensitization and challenges with HDM (or PBS as a control), as outlined in Figure 1A. **a-b.** Number of IL-4<sup>+</sup> CD4<sup>+</sup> T cells (**a**) IL-13<sup>+</sup> CD4<sup>+</sup> T cells (**b**) in the lung. Data show values from individual mice with bars indicating mean  $\pm$  SEM, from a single experiment ( $n=4$ /group). **c.** Representative lung sections stained with anti-KLRG1 antibodies (green), anti-CD3 $\epsilon$  (red), anti-IL-4 (purple) and DAPI (blue), 24 h after the last HDM challenge. Right panels represent magnification of the dashed areas. Scale bars: 30  $\mu$ m. **d.** Number of ILC2 (identified as KLRG1<sup>+</sup>CD3 $\epsilon$ <sup>-</sup> cells) expressing IL-4. Results show values from individual field of view (FOV), with 4 FOV analyzed in each of 4 mice/group. Bars indicate means  $\pm$  SEMs.  $P$  values vs. PBS/PBS group were calculated using two-tailed Mann-Whitney  $U$  test. Source data are provided in the Source Data file.

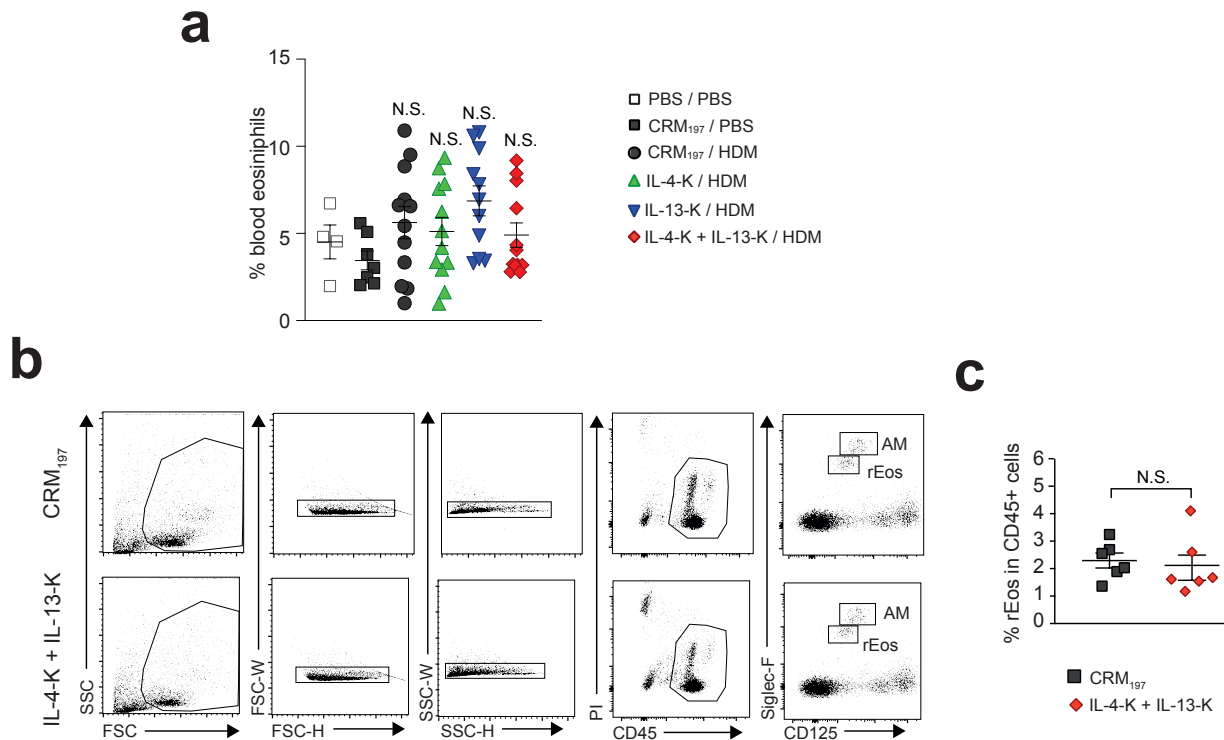

**Supplementary Figure 9. Effect of vaccination with IL-4-K and/or IL-13-K on blood eosinophils and lung-resident regulatory eosinophils. a.** Mice were vaccinated with IL-4-K and/or IL-13-K (or PBS or CRM<sub>197</sub> as controls) followed by sensitization and challenge with HDM (or PBS as a control), as outlined in Figure 1A. Percentage of SSC<sup>high</sup> Siglec-F<sup>+</sup> blood eosinophils 24 h after the last HDM challenge. Results show values from individual mice with bars indicating means  $\pm$  SEMs from  $n=4$  mice (PBS/PBS control group) or  $n=7$  mice (CRM<sub>197</sub>/PBS control group) or  $n=11$  (IL-13-K/HDM group) or  $n=12$  mice (CRM<sub>197</sub>/HDM, IL-4-K/HDM and IL-4-K+IL-13-K/HDM groups) pooled from two independent experiments. **b.** Dot plot of lung leukocytes showing strategy to gate regulatory eosinophils (rEos) according to Siglec-F and CD125 expression (as described previously<sup>23</sup>). AM: alveolar macrophages; FSC, forward scatter; SSC, side scatter; PI: propidium iodide. **c.** Percentage of regulatory eosinophils among resident CD45<sup>+</sup> lung leukocytes in mice vaccinated with IL-4-K and IL-13-K or CRM<sub>197</sub> as a control. In a and c, results show values from individual mice with bars indicating means  $\pm$  SEMs from  $n=6$  mice per group pooled from two independent experiments. N.S.: not significant;  $P > 0.05$  using two-tailed Mann-Whitney  $U$  test. Source data are provided in the Source Data file.

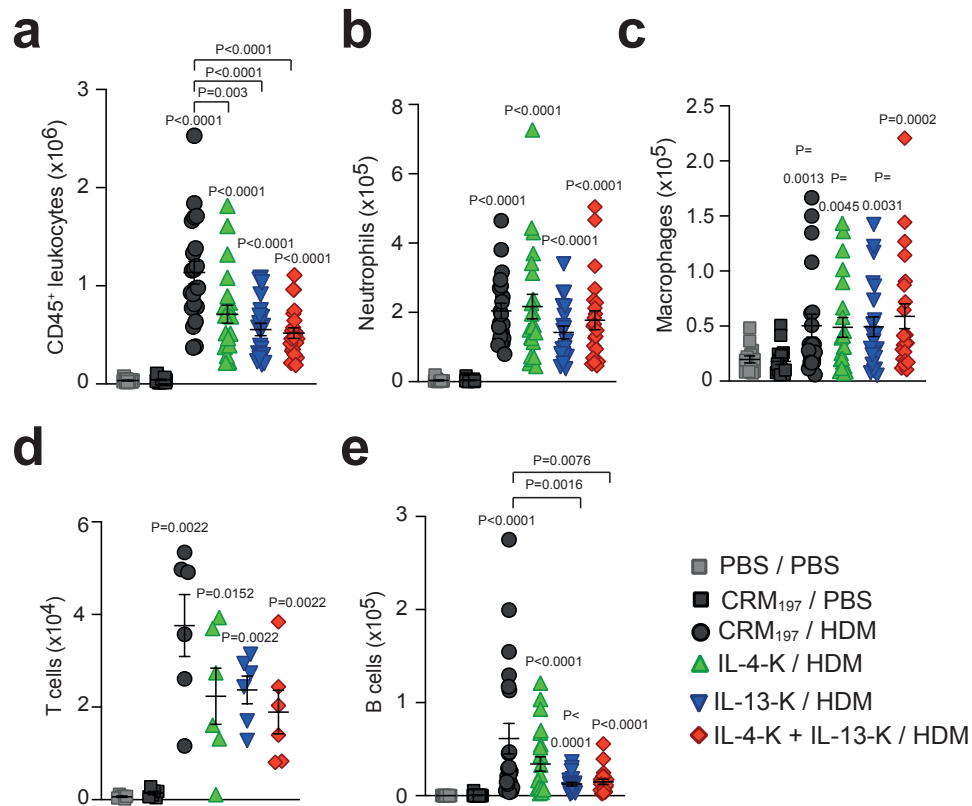

**Supplementary Figure 10. Effects of IL-4-K and/or IL-13-K on BAL leukocytes in an asthma model.** **a-e.** Numbers of CD45<sup>+</sup> total leukocytes (**a**), CD45<sup>+</sup>, CD11c<sup>-</sup>, B220<sup>-</sup>, CD3ε<sup>-</sup>, Ly6G<sup>+</sup>, CD11b<sup>+</sup> neutrophils (**b**), CD45<sup>+</sup>, CD11c<sup>+</sup>, Siglec-F<sup>+</sup>, CD11b<sup>+</sup> macrophages (**c**), CD45<sup>+</sup>, CD11c<sup>-</sup>, CD3ε<sup>+</sup> T cells (**d**) and CD45<sup>+</sup>, CD11c<sup>-</sup>, B220<sup>+</sup> B cells (**e**) in BAL fluid 24 h after the last HDM challenge. Data show values from individual mice with bars indicating mean ± SEM, from a single experiment (in **d**;  $n=6$ /group) or pooled from three independent experiments. In **a-c** and **e**,  $n=12$  mice (PBS/PBS group),  $n=16$  mice (CRM/PBS group),  $n=19$  mice (IL-13-K/HDM group) or  $n=20$  mice (IL-4-K and IL-4-K+IL-13-K groups).  $P$  values were calculated using two-tailed Mann-Whitney  $U$  test vs. CRM/PBS group or vs. indicated group. Source data are provided in the Source Data file.

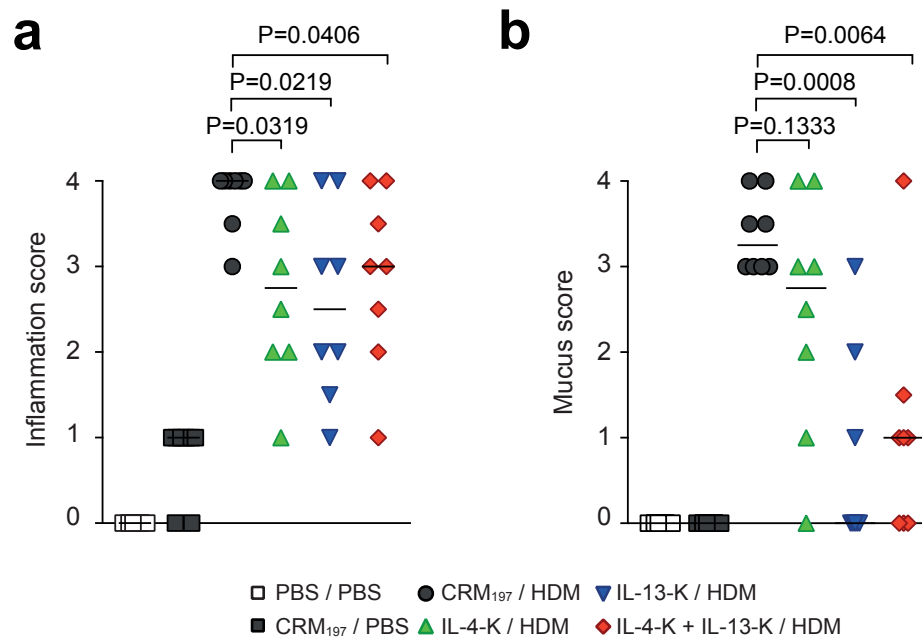

**Supplementary Figure 11. Effects of IL-4-K and/or IL-13-K on lung inflammation and mucus production in an asthma model.** Mice were vaccinated with IL-4-K and/or IL-13-K (or PBS or CRM<sub>197</sub> as controls) followed by sensitization and challenge with HDM (or PBS as a control), as outlined in Figure 1a. **a.** The extent of leukocyte infiltration was scored in the H&E-stained lung tissue sections shown in Fig. 1h obtained 24 h after the last challenge with HDM. **b.** The extent of mucus production was scored according to the percentage of goblet cells in bronchial epithelium from the PAS-stained lung tissue sections shown in Fig. 1i obtained 24 h after the last challenge with HDM. Data show values from individual mice with bars indicating median, from a single experiment with  $n=8$  mice per group.  $P$  values vs. CRM<sub>197</sub>/HDM group were calculated using two-tailed Mann-Whitney  $U$  test. Source data are provided in the Source Data file.

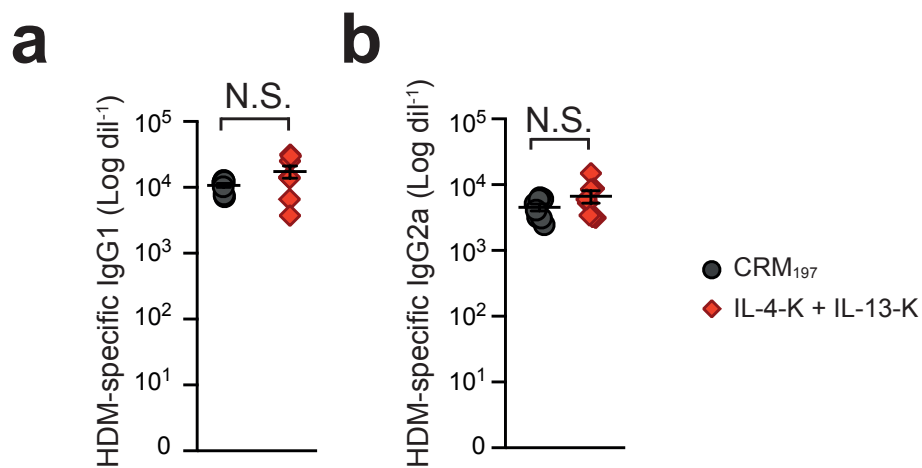

**Supplementary Figure 12. Levels of HDM-specific IgG1 and IgG2a in mice vaccinated with IL-4-K and IL-13-K.** Levels of HDM-specific IgG1 (a) and HDM-specific IgG2a (b) 24 h after the last HDM challenge in mice vaccinated with IL-4-K and IL-13-K, or CRM<sub>197</sub> alone as a control. Results show values from individual mice with bars indicating mean  $\pm$  SEM. Data are from a single experiment with  $n=8$  mice per group, representative of two independent experiments. N.S.: not significant ( $P > 0.05$  using two-tailed Mann-Whitney  $U$  test). Source data are provided in the Source Data file.

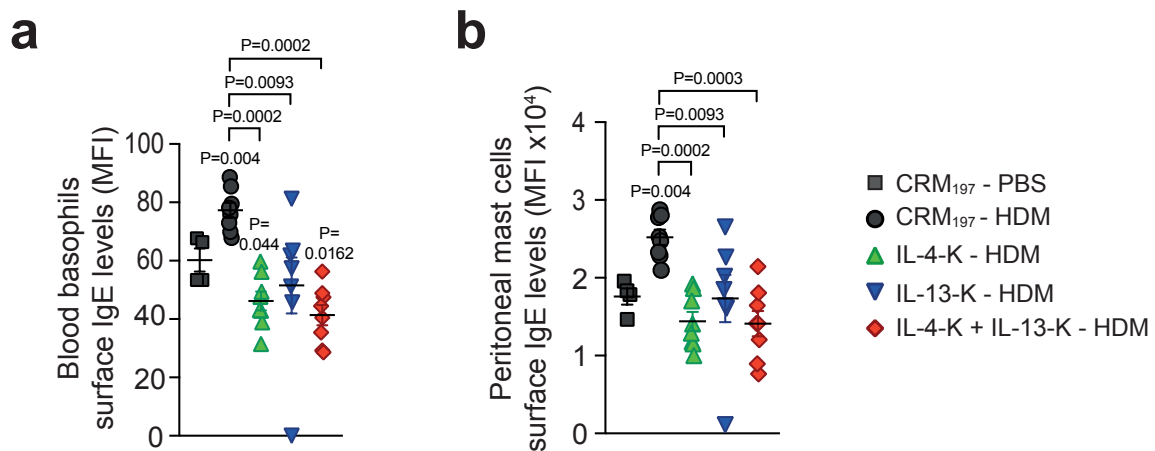

**Supplementary Figure 13. Effects of IL-4-K and/or IL-13-K on surface IgE levels in blood basophils and peritoneal mast cells.** Mice were vaccinated with IL-4-K and/or IL-13-K (or PBS or CRM<sub>197</sub> as controls) followed by sensitization and challenge with HDM (or PBS as a control), as outlined in Figure 1a. Levels of IgE on the surface of IgE<sup>+</sup> CD49b<sup>+</sup> blood basophils (MFI: mean fluorescence intensity) (a), and levels of IgE on the surface of CD117<sup>+</sup> peritoneal mast cells (MFI) (b) 24 h after the last HDM challenge. Results show values from individual mice with bars indicating means  $\pm$  SEMs from  $n=4$  mice (CRM<sub>197</sub>/PBS control group),  $n=7$  mice (IL-13-K/HDM) or  $n=8$  mice (IL-4-K/HDM, IL-4-K+IL-13-K/HDM) pooled from two independent experiments.  $P$  values vs. CRM<sub>197</sub>/PBS group or vs. indicated group were calculate using two-tailed Mann-Whitney U test. Source data are provided in the Source Data file.



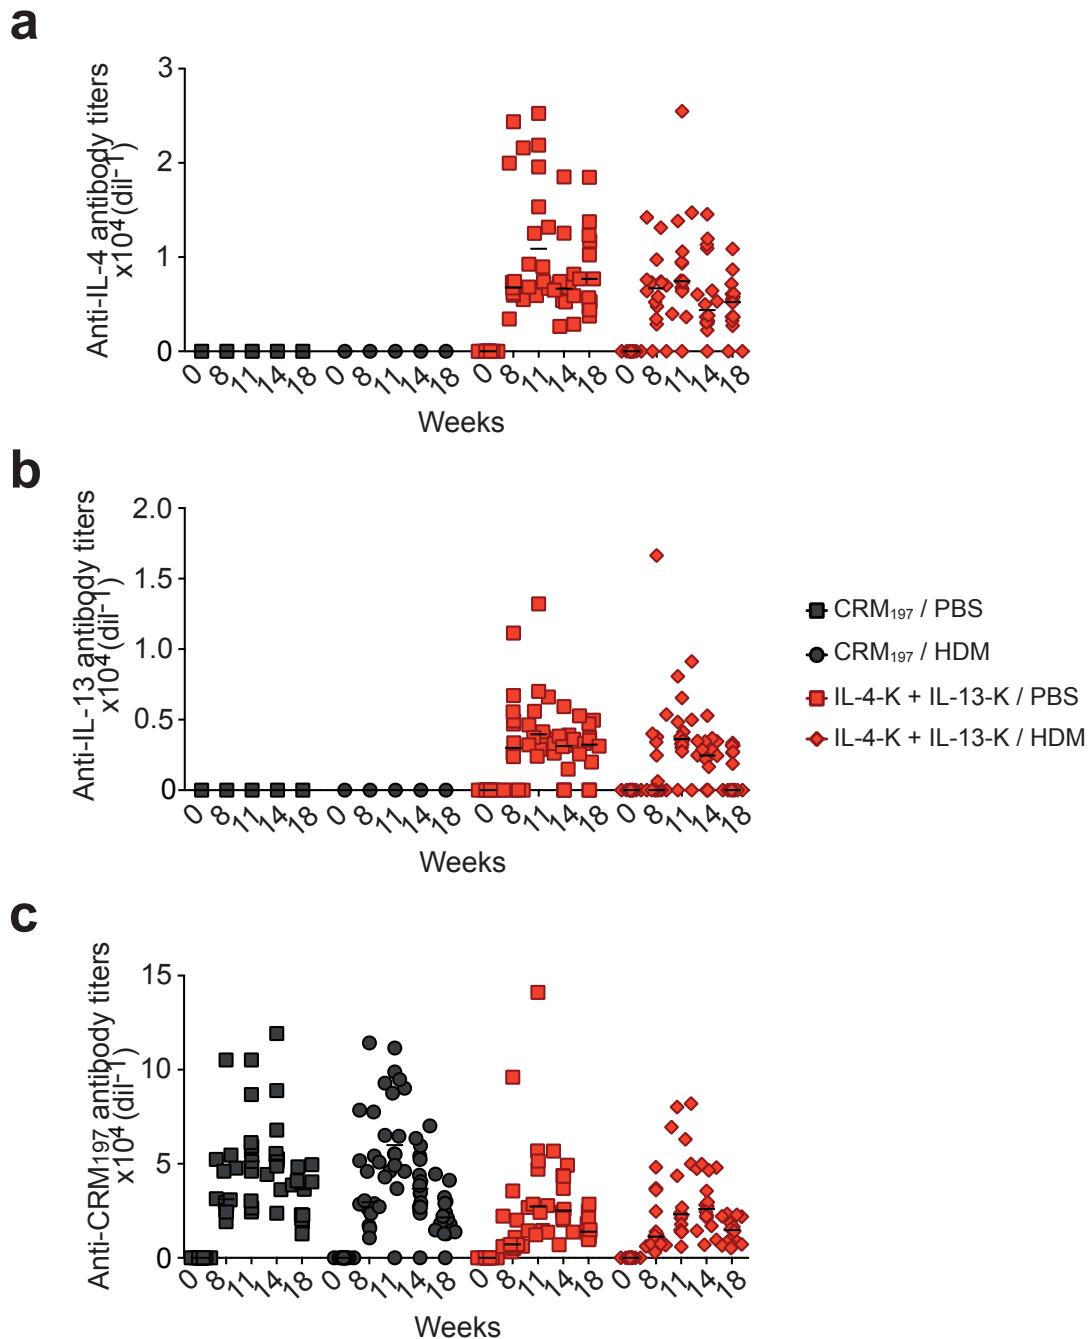

**Supplementary Figure 15. Anti-IL-4, anti-IL-13 and anti-CRM<sub>197</sub> antibody titers upon therapeutic dual vaccination with IL-4-K and IL-13-K.** Mice were sensitized and challenged with HDM extract (or PBS as a control). After the third challenge, mice were vaccinated with IL-4-K and IL-13-K in combination (or CRM<sub>197</sub> as control), as outlined in Figure 3A. Anti-IL-4 (a), anti-IL-13 (b) and anti-CRM<sub>197</sub> antibody titers (c) in sera from mice at indicated time points. Results show values from individual mice pooled from two independent experiments with bars indicating median ( $n=12$  for all PBS groups and  $n=16$  for all HDM groups). Source data are provided in the Source Data file.



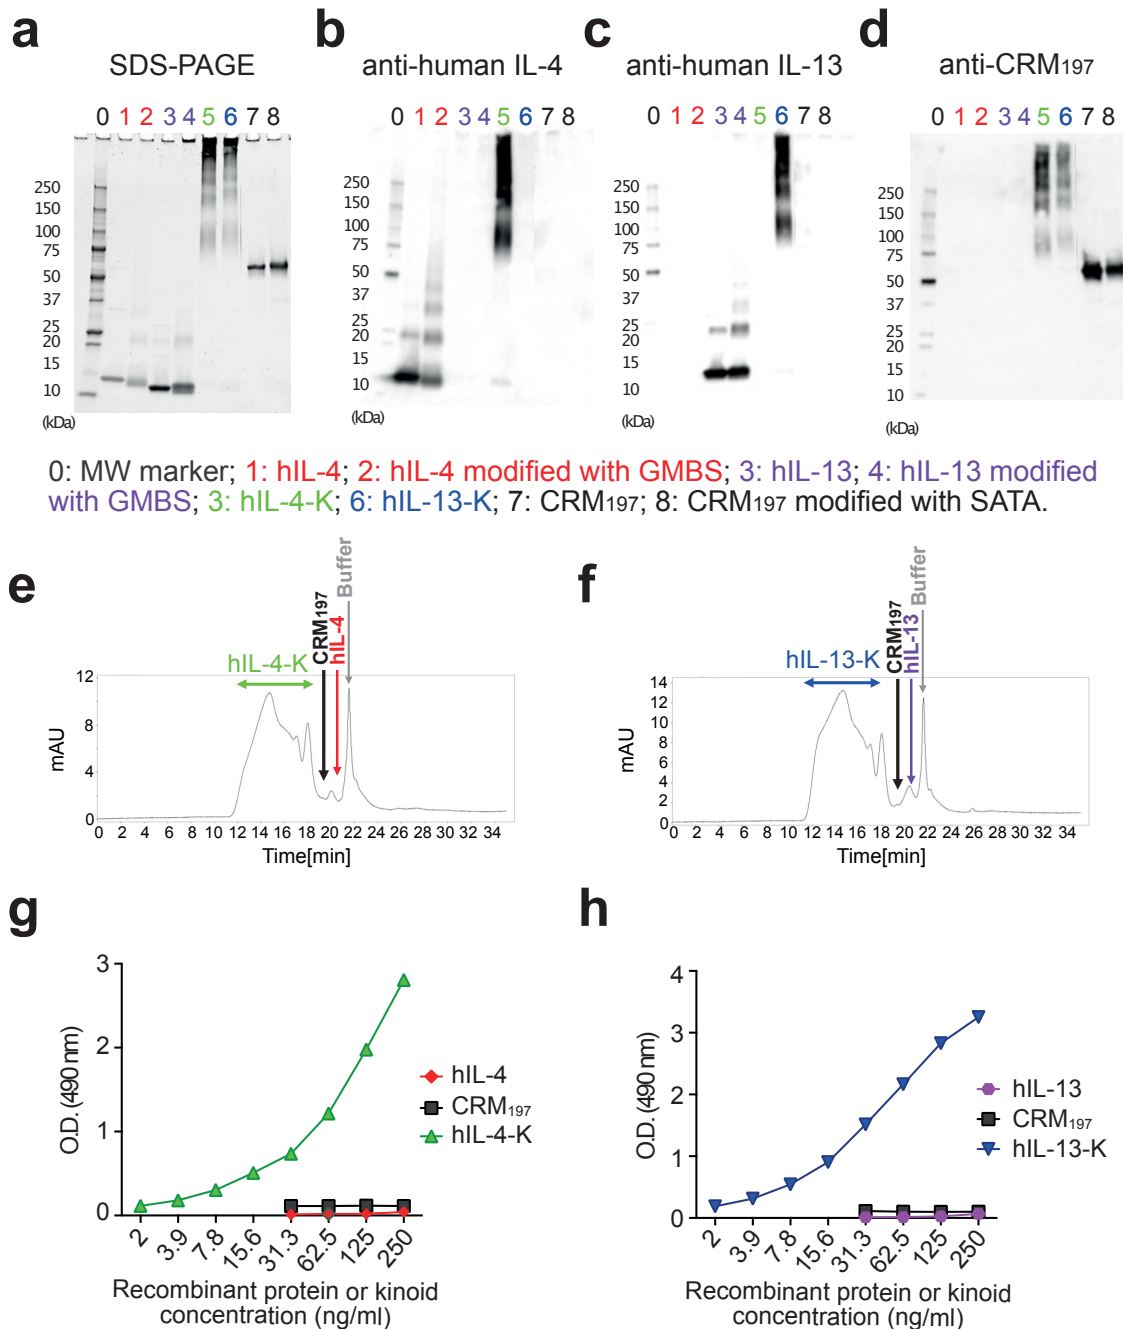

**Supplementary Figure 16. Characterization of human IL-4-K and IL-13-K.** Generation of high molecular weight kinoids upon conjugation of human IL-4 or human IL-13 to CRM<sub>197</sub> was confirmed using SDS-PAGE (**a**), western blots against human IL-4 (**b**), human IL-13 (**c**) or CRM<sub>197</sub> (**d**), and size exclusion (SE)-HPLC (**e** and **f**). Epitope preservation and antigenicity of human IL-4-K (hIL-4-K) and hIL-13-K was analyzed by sandwich ELISA using plates coated with anti-CRM<sub>197</sub> antibodies and revealed with anti-human IL-4 (**g**) or anti-human IL-13 (**h**) antibodies. Data from a-d are representative of 3 independent experiments. Source data are provided in the Source Data file.

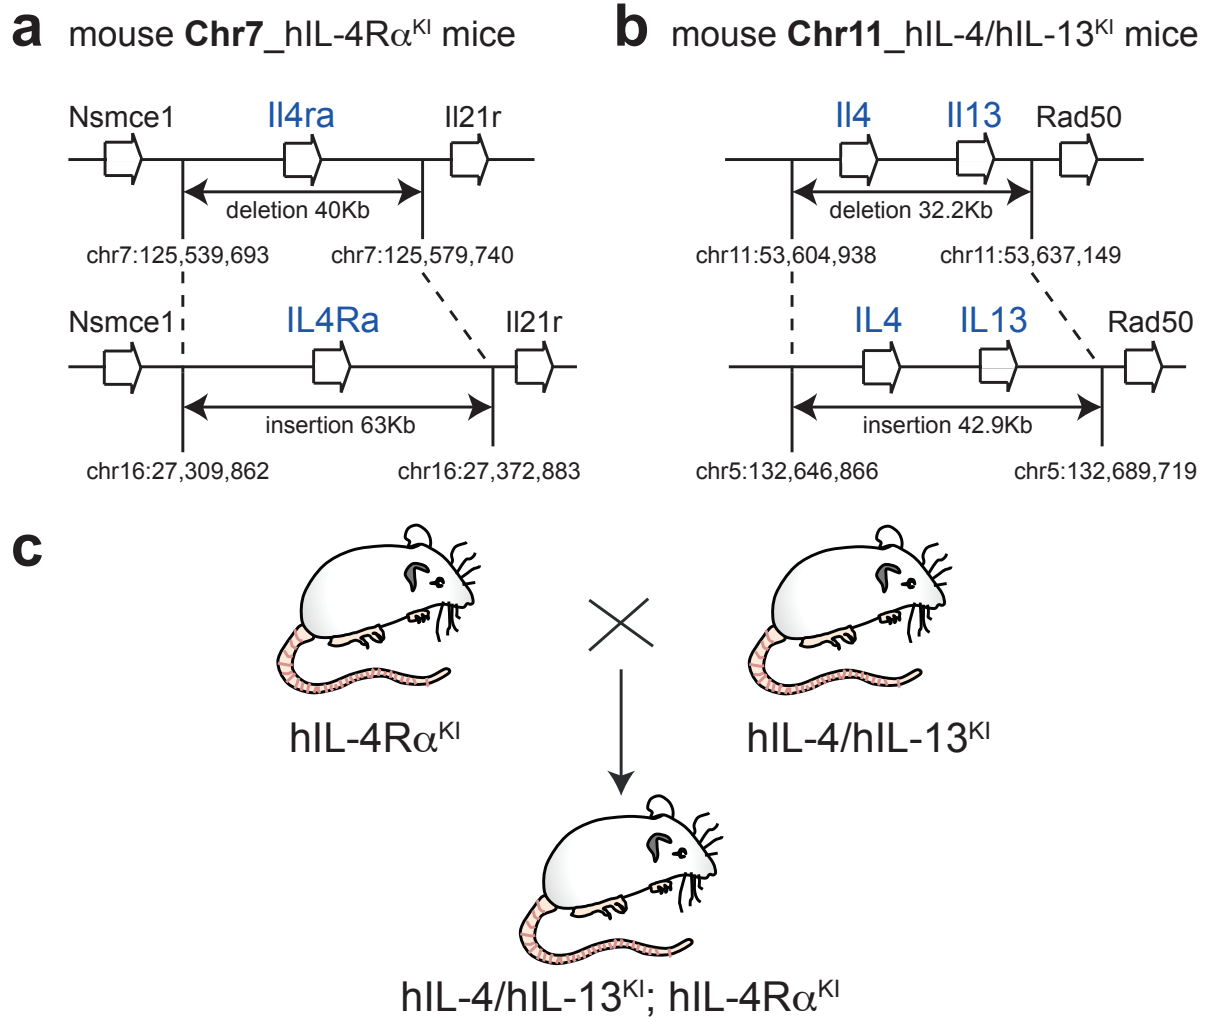

**Supplementary Figure 17. Generation of hIL-4/hIL-13<sup>KI</sup>; hIL-4R $\alpha$ <sup>KI</sup> mice. a-b.** Humanization of the mouse *Il4ra* locus (a) and *il4/il13* locus (b). Representations are not drawn to scale. **c.** Breeding scheme to obtain hIL-4/hIL-13<sup>KI</sup>; hIL-4R $\alpha$ <sup>KI</sup> mice.

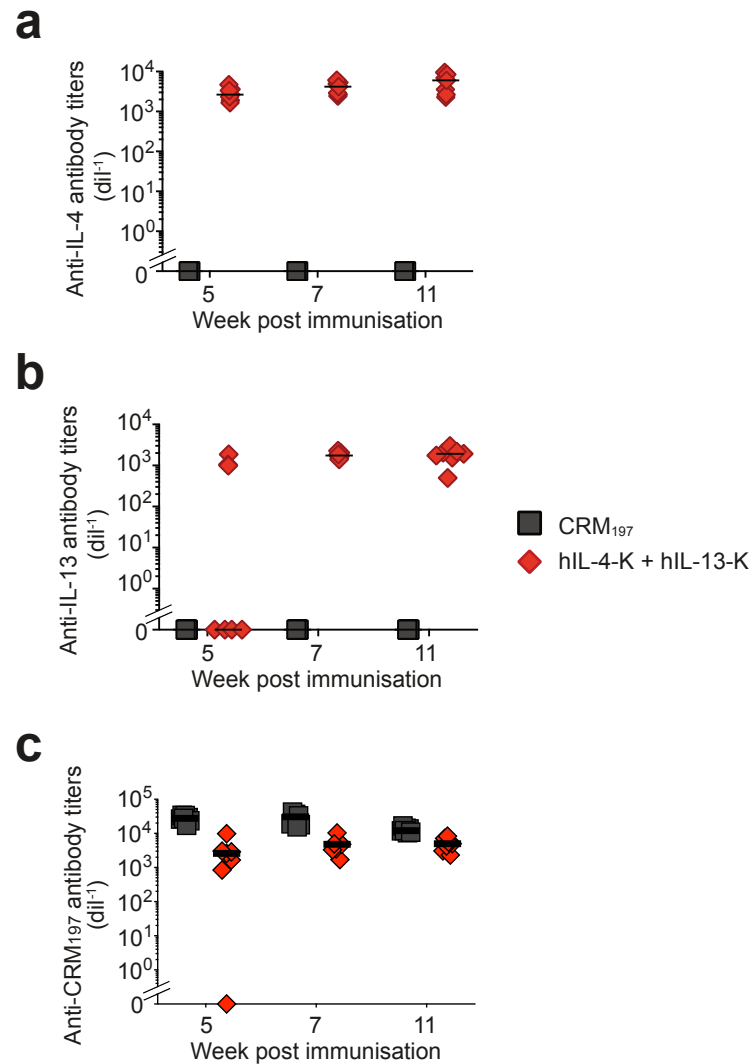

**Supplementary Figure 18. Anti-hIL-4, anti-hIL-13 and anti-CRM<sub>197</sub> antibody titers upon dual vaccination with human IL-4 and IL-13 kinoids in IL-4/IL-13<sup>KI</sup>; IL-4R $\alpha$ <sup>KI</sup> humanized mice.** IL-4/IL-13<sup>KI</sup>; IL-4R $\alpha$ <sup>KI</sup> humanized mice were vaccinated with hIL-4-K and hIL-13-K in combination (or CRM<sub>197</sub> as control), as described in Fig. 4a. Anti-human IL-4 (a), anti-human IL-13 (b) and anti-CRM<sub>197</sub> (c) antibody titers in sera at the indicated time-points. Results show values from individual mice with bars indicating medians ( $n=7$  mice per group). Source data are provided in the Source Data file.

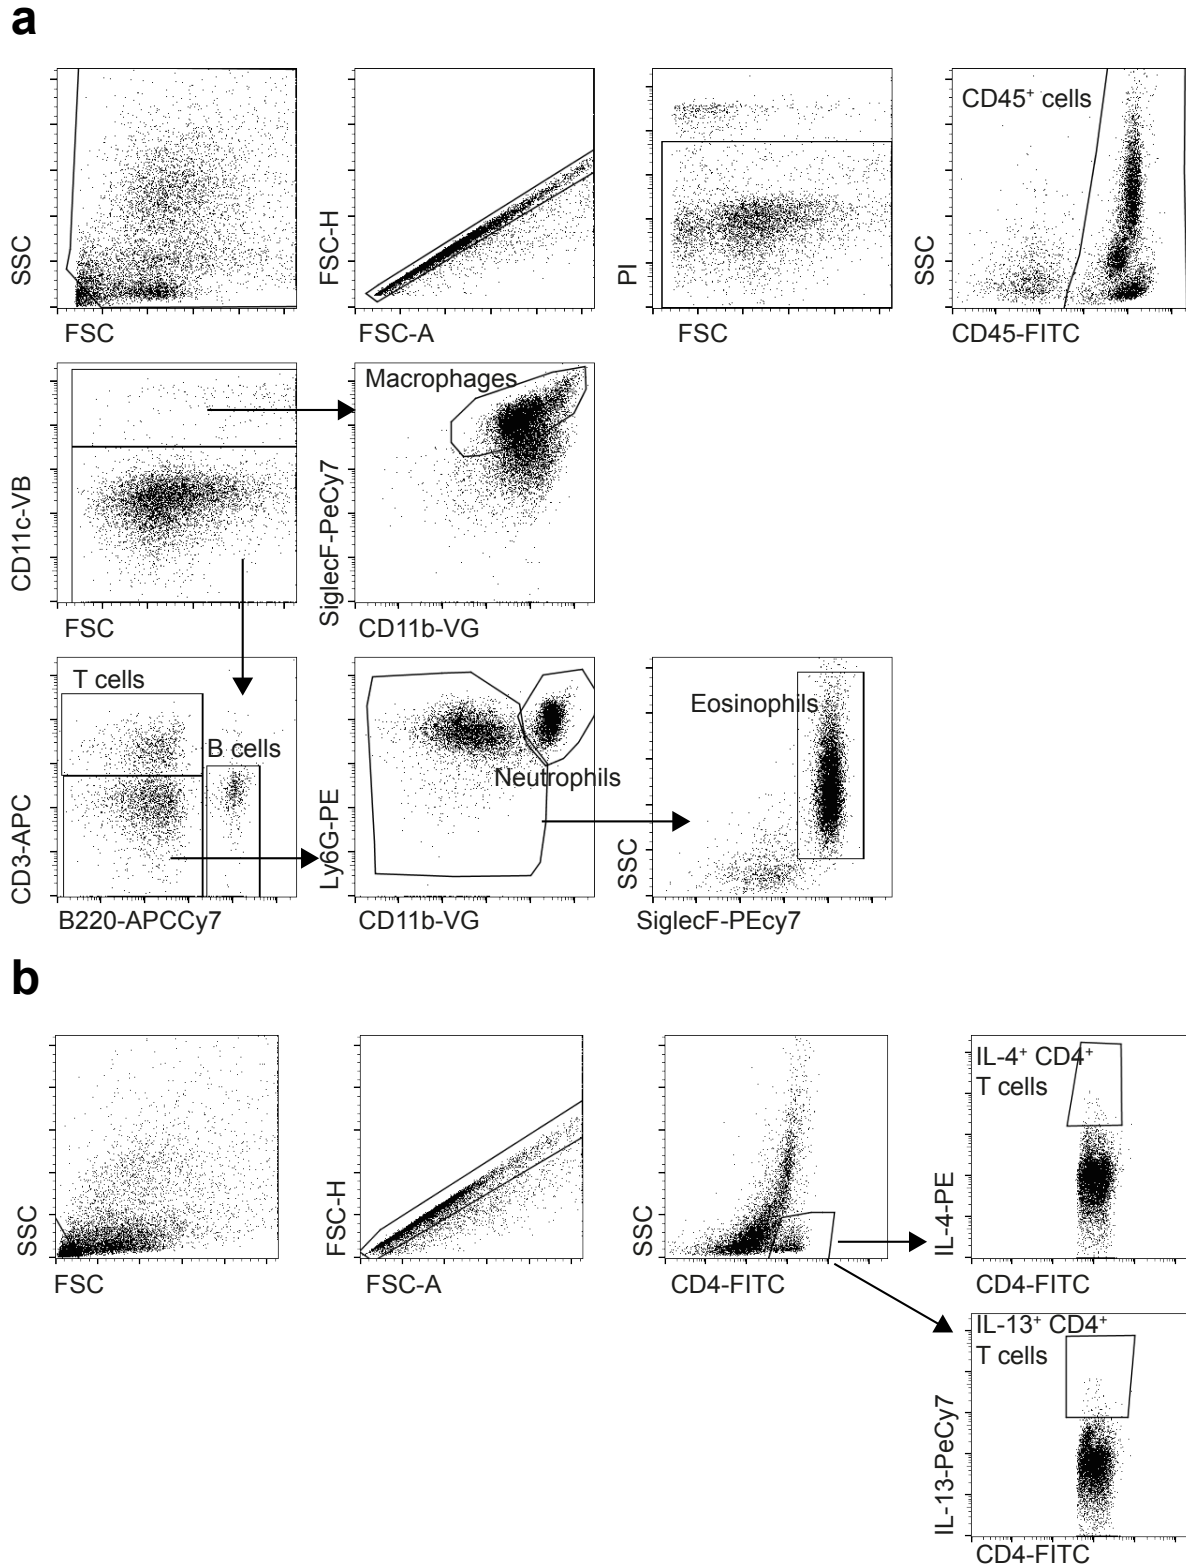

**Supplementary Figure 19.** Gating strategy for the analysis of leukocyte populations in BAL and lung cell suspensions (a) and intracellular IL-4 and IL-13 levels in lung CD4<sup>+</sup> T cells (b) by flow cytometry.

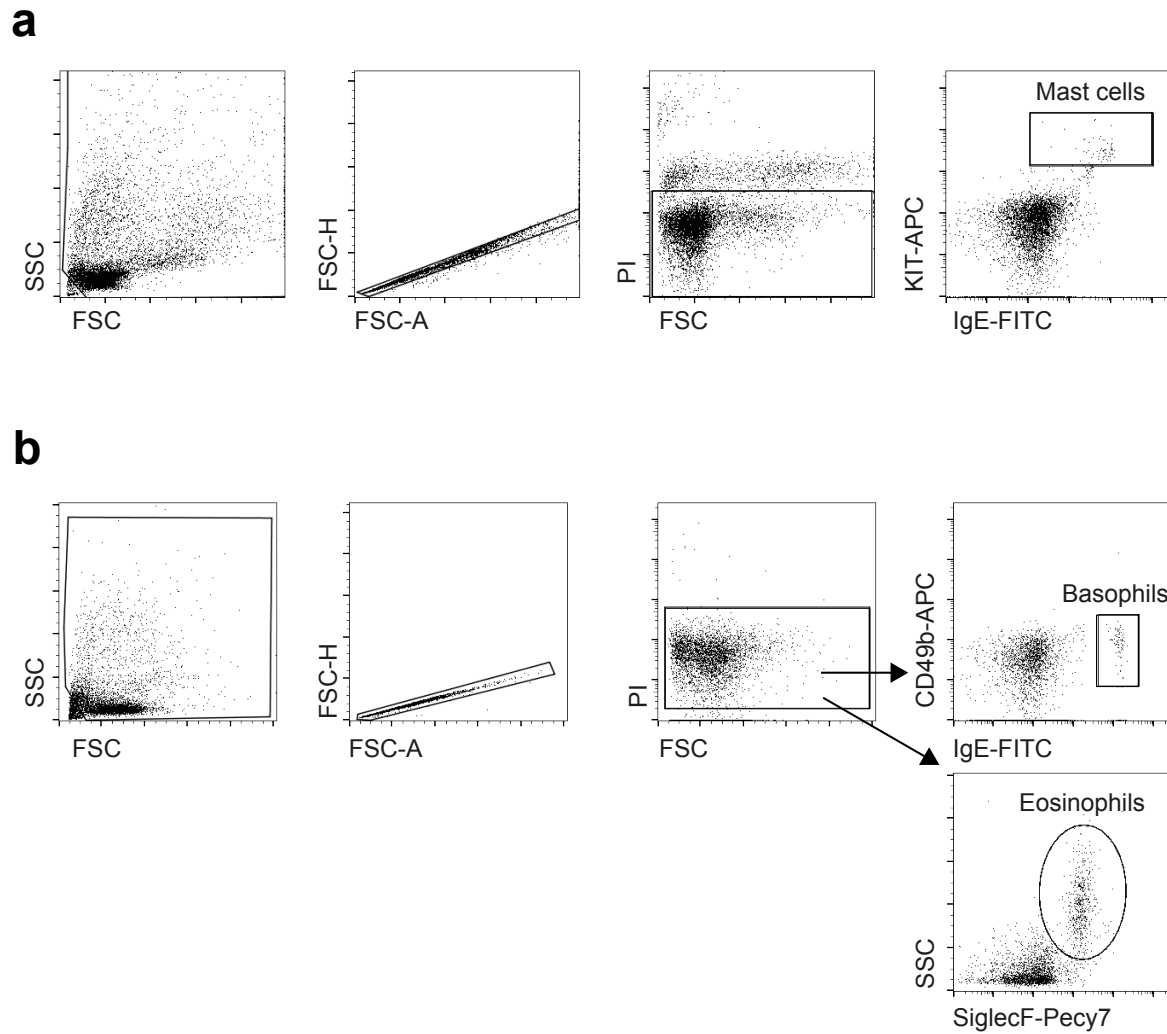

**Supplementary Figure 20.** Gating strategy for the analysis of peritoneal mast cells (a) and blood basophils and eosinophils (b) by flow cytometry.

| ANTIBODY                                          | SOURCE            | CLONE     | IDENTIFIER  | Dilution  |
|---------------------------------------------------|-------------------|-----------|-------------|-----------|
| anti-mouse IL-4 polyclonal goat IgG               | R&D systems       | n/a       | AF-404-NA   | 0.1 µg/ml |
| anti-human IL-4 polyclonal goat IgG               | R&D systems       | n/a       | AF-204-NA   | 0.1 µg/ml |
| anti-mouse IL-13 polyclonal goat IgG              | R&D systems       | n/a       | AF-413-NA   | 0.1 µg/ml |
| anti-human IL-13 polyclonal goat IgG              | R&D systems       | n/a       | AF-213-NA   | 0.1 µg/ml |
| anti-diphtheria toxin polyclonal goat IgG         | AbD serotec       | n/a       | 3710-0956   | 860 ng/ml |
| monoclonal mouse anti-diphtheria toxin IgG1       | AbD serotec       | 8G1       | 3710-0100   | 1 µg/ml   |
| anti-human IL-4 monoclonal mouse IgG1             | R&D systems       | 3007      | MAB304      | 1 µg/ml   |
| anti-human IL-13 monoclonal mouse IgG1            | R&D systems       | 32116     | MAB213      | 1 µg/ml   |
| biotinylated anti-mouse IL-4 polyclonal goat IgG  | R&D systems       | n/a       | BAF-404     | 250 ng/ml |
| biotinylated anti-human IL-4 polyclonal goat IgG  | R&D systems       | n/a       | BAF-204     | 250 ng/ml |
| biotinylated anti-mouse IL-13 polyclonal goat IgG | R&D systems       | n/a       | BAF-413     | 250 ng/ml |
| biotinylated anti-human IL-13 polyclonal goat IgG | R&D systems       | n/a       | BAF-213     | 250 ng/ml |
| anti-Ly6G-PE rat IgG <sub>2a</sub>                | BD Pharmingen     | 1A8       | 561104      | 1:100     |
| anti-CD3-APC armenian hamster IgG <sub>1</sub>    | BD Pharmingen     | 145-2C11  | 561826      | 1:100     |
| anti-CD4-FITC Rat IgG2bk                          | Miltenyi Biotec   | GK1.5     | 130-120-819 | 1:50      |
| anti-IL-4-PE rat IgG2b                            | Miltenyi Biotec   | BVD4-1D11 | 130-103-016 | 1:20      |
| anti-mouse IL-4-APC Rat IgG1k                     | eBioscience       | 11B11     | 53-7041-82  | 10 µg/ml  |
| anti-IL-13-PE-Cyanine7 Rat IgG1                   | Fisher Scientific | eBio13A   | 15538636    | 1:200     |
| anti-KLRG1-AF488 Hamster IgG <sub>2κ</sub>        | BD Pharmingen     | 2F1       | 562190      | 10 µg/ml  |
| anti-CD3-AF532                                    | eBioscience       | 17A2      | 58-0032-82  | 2 µg/ml   |
| anti-CD45-FITC human IgG <sub>1</sub>             | Miltenyi Biotec   | REA737    | 130-110-658 | 1:100     |
| anti-CD45-VB human IgG <sub>1</sub>               | Miltenyi Biotec   | REA737    | 130-110-802 | 1:200     |
| anti-Siglec-F-PECy7 human IgG <sub>1</sub>        | Miltenyi Biotec   | REA798    | 130-112-334 | 1:100     |
| anti-CD11b-VG recombinant human IgG <sub>1</sub>  | Miltenyi Biotec   | REA713    | 130-110-559 | 1:100     |
| anti-B220-APC rat IgG <sub>2a</sub>               | Miltenyi Biotec   | RA3-6B2   | 130-102-259 | 1:100     |
| anti-CD11c-VB, hamster IgG                        | Miltenyi Biotec   | N418      | 130-102-797 | 1:100     |
| anti-CD49b-APC, Rat IgM                           | eBioscience       | DX5       | 17-5971-82  | 1:100     |
| anti-IgE-FITC, Rat IgG <sub>1</sub>               | BD Pharmingen     | R35-72    | 553415      | 1:50      |

|                                                 |                     |          |            |          |
|-------------------------------------------------|---------------------|----------|------------|----------|
| anti-CD125-PE, Rat IgG1                         | BD Pharmingen       | T21      | 558488     | 1:100    |
| Purified NA/LE Rat Anti-Mouse CD124             | BD Pharmingen       | mIL4R-M1 | 552288     | 10 µg/mL |
| anti-Siglec-F-Alexa647, Rat IgG2a               | BD Pharmingen       | E50-2440 | 562680     | 1:100    |
| anti-c-KIT APC                                  | eBioscience         | 2B8      | 17-1171-82 | 1:200    |
| rabbit polyclonal HRP-conjugated anti-mouse IgG | Invitrogen          | n/a      | 61-6520    | 1:5000   |
| Goat polyclonal Anti-Mouse IgG1 Human ads-HRP   | Southern Biotech    | n/a      | 1070-05    | 1:4000   |
| Goat anti-Rat IgG (H+L), Alexa Fluor 594        | Invitrogen          | n/a      | A11007     | 1:150    |
| Goat polyclonal Anti-Mouse IgG2a Human ads-HRP  | Southern Biotech    | n/a      | 1080-05    | 1:4000   |
| goat polyclonal anti-mouse IgE antibody         | Bio-rad             | n/a      | STAR110    | 2 µg/mL  |
| goat polyclonal HRP-conjugated anti-mouse IgG   | Bethyl Laboratories | n/a      | A90-131P   | 1:5000   |
| anti-IgE antibody coupled to AF488, Rat IgG1, κ | Biolegend           | RME-1    | 406910     | 10 µg/ml |

**Supplementary Table 1. List of antibodies used in this study.**
